# Supplementary material for: Nitrogen-vacancy-modulated efficient ammonia desorption over 3d TM-anchored BC3N2 monolayer
Source: Royal Society of Chemistry journal article supplement (doi:10.1039/d3cp04572b), 2023-11-27
Supplement: d3cp04572b1.pdf [file d3cp04572b1.pdf]

## Supporting Information

### Nitrogen Vacancies Modulated Efficient Ammonia Desorption over metal-free BC<sub>3</sub>N<sub>2</sub> monolayer

Long Lin<sup>a</sup>, Kun Xie<sup>a</sup>, Chaozheng He<sup>b,c\*</sup>,

<sup>a</sup> Henan Key Laboratory of Materials on Deep-Earth Engineering, School of Materials Science and Engineering, Henan Polytechnic University, Jiaozuo, 454000, Henan, China

<sup>b</sup> Institute of Environmental and Energy Catalysis, School of Materials Science and Chemical Engineering, Xi'an Technological University, Xi'an 710021, China

<sup>c</sup> Shaanxi Key Laboratory of Optoelectronic Functional Materials and Devices, School of Materials Science and Chemical Engineering, Xi'an Technological University, Xi'an 710021, China

\*Author to whom correspondence should be addressed.

E-mail address: [hec2019@xatu.edu.cn](mailto:hec2019@xatu.edu.cn) (C. He);

Number of Pages: 9

Number of Notes: 1

Number of Figures: 9

Number of Tables: 9

### Note S1. Gibbs free energy calculation

Free energies of the NRR intermediates in electrochemical reaction pathways were calculated based on the computational hydrogen electrode (CHE) model proposed by Nørskov et al. [1] The chemical potential of the  $H^+/e^-$  pair was considered as half of the gas-phase  $H_2$ . Thus, the change of Gibbs free energy ( $\Delta G$ ) for each reaction step was given by : □ □ □ □ □ □ □

$$\Delta G = \Delta E + \Delta ZPE - T\Delta S + \Delta G_U + \Delta G_{pH} \quad (S-1)$$

where  $\Delta E$  is calculated directly by DFT,  $\Delta ZPE$  is the zero-point energy correction,  $T$  is the temperature ( $T = 298.15$  K), and  $\Delta S$  is the change in entropy.  $\Delta G_U$  is the contribution of the electrode potential ( $U$ ) to  $\Delta G$ , and  $\Delta G_{pH} = k_B T \times \ln 10 \times pH$ , where  $k_B$  is the Boltzmann constant under standard reaction conditions.

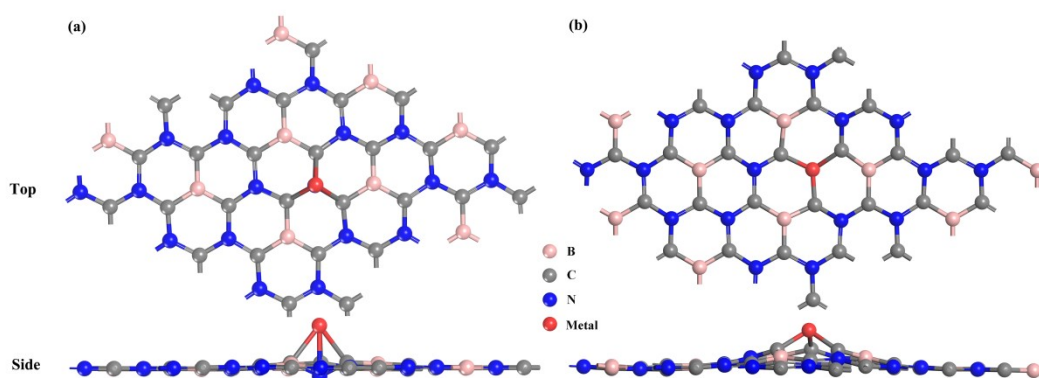

Fig. S1 The top and side views for the relaxed structures of TM@BC<sub>3</sub>N<sub>2</sub> model (a) and V<sub>N</sub>-TM@BC<sub>3</sub>N<sub>2</sub> model (b). Colored spheres are B (pink), C (gray), N (blue) atom and Metal (jacinth).

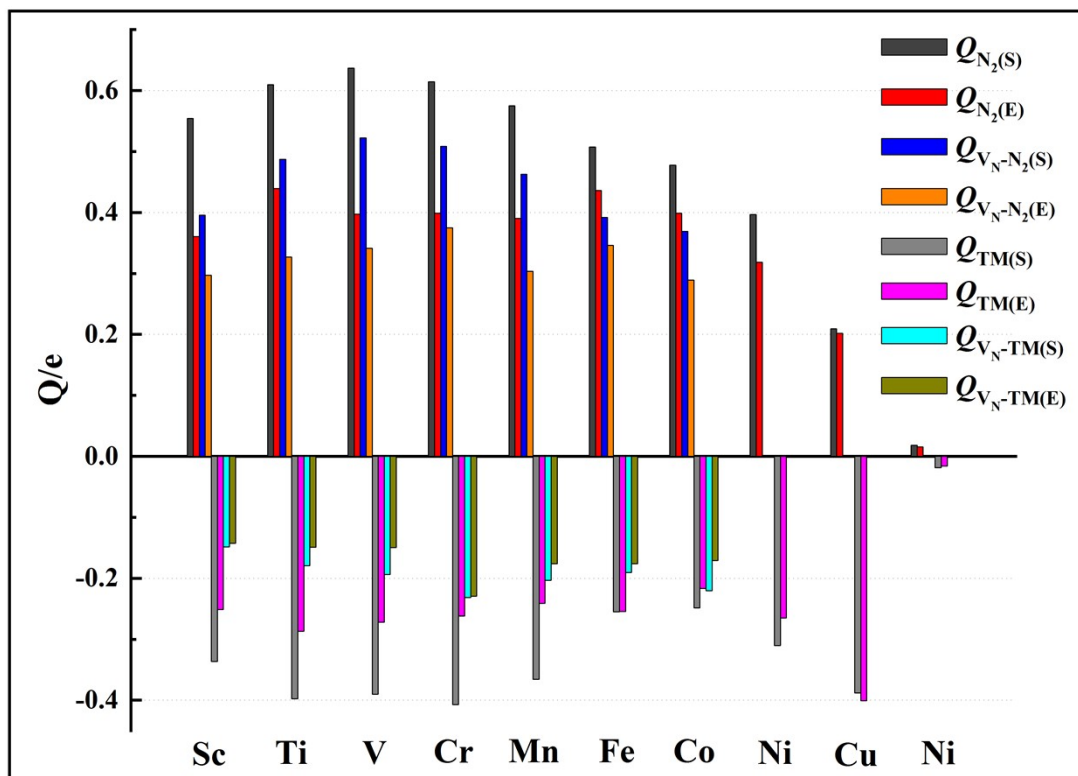

Fig. S2 Relationship between calculated charge transfer from the catalyst to  $N_2$  ( $\Delta Q_{N_2(S/E)}$ ,  $\Delta Q_{V_N-N_2(S/E)}$ ) and charge transfer of TM before and after  $N_2$  adsorption ( $\Delta Q_{TM(S/E)}$ ,  $\Delta Q_{V_N-TM(S/E)}$ ).

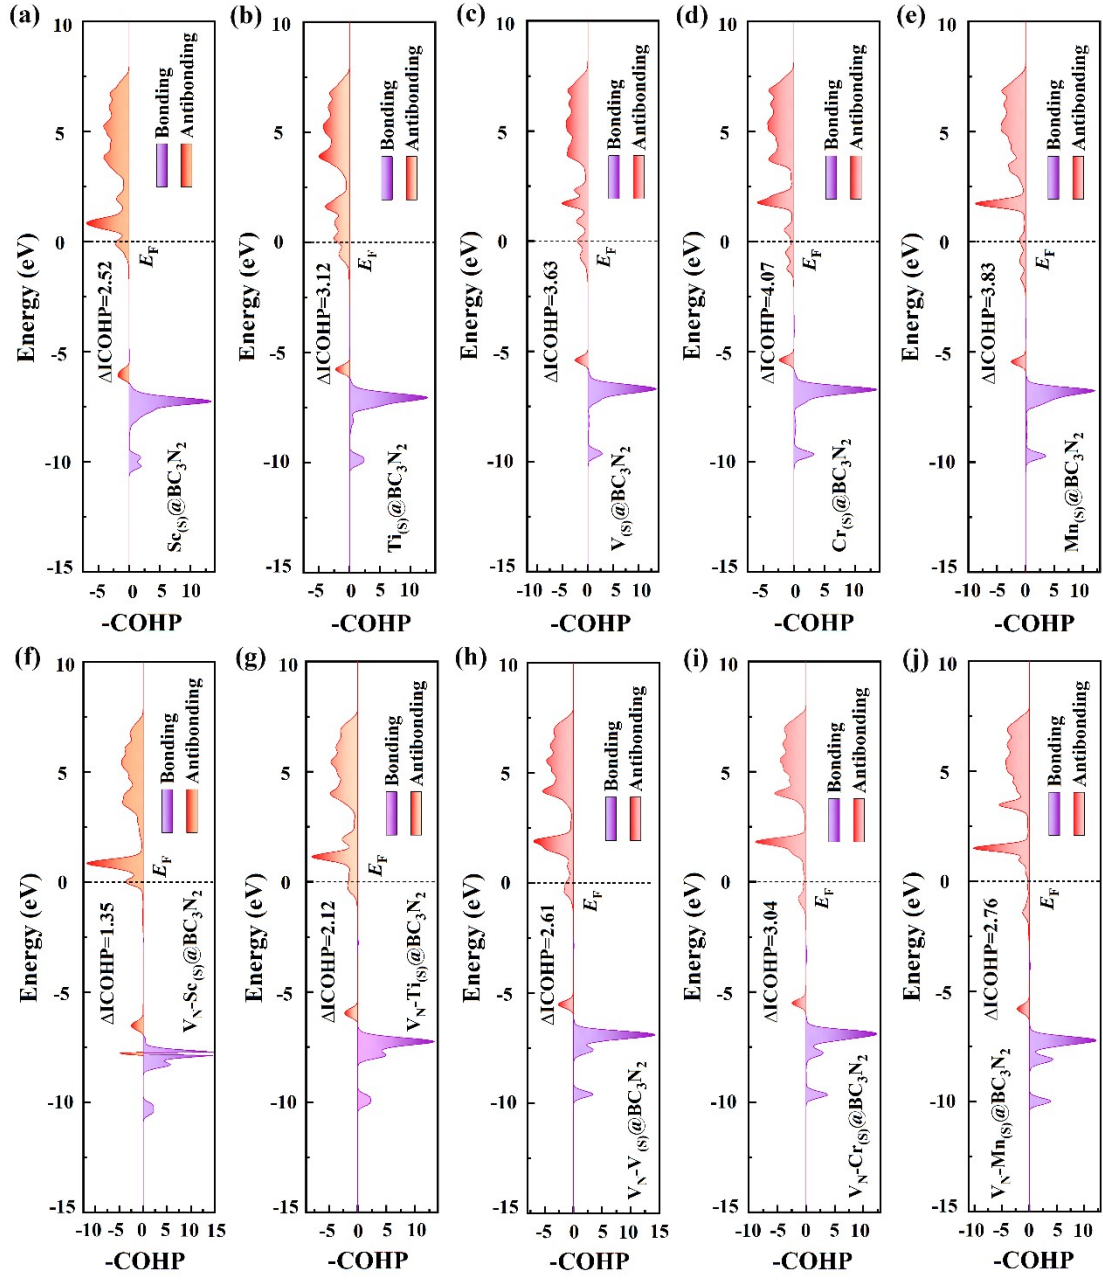

Fig. S3 Crystal Orbital Hamilton Population (COHP) between the two single atoms of nitrogen when  $N_2$  horizontal adsorption on  $TM@BC_3N_2$  and  $V_N-TM@BC_3N_2$  ( $TM=Sc, Ti, V, Cr, Mn$ ).

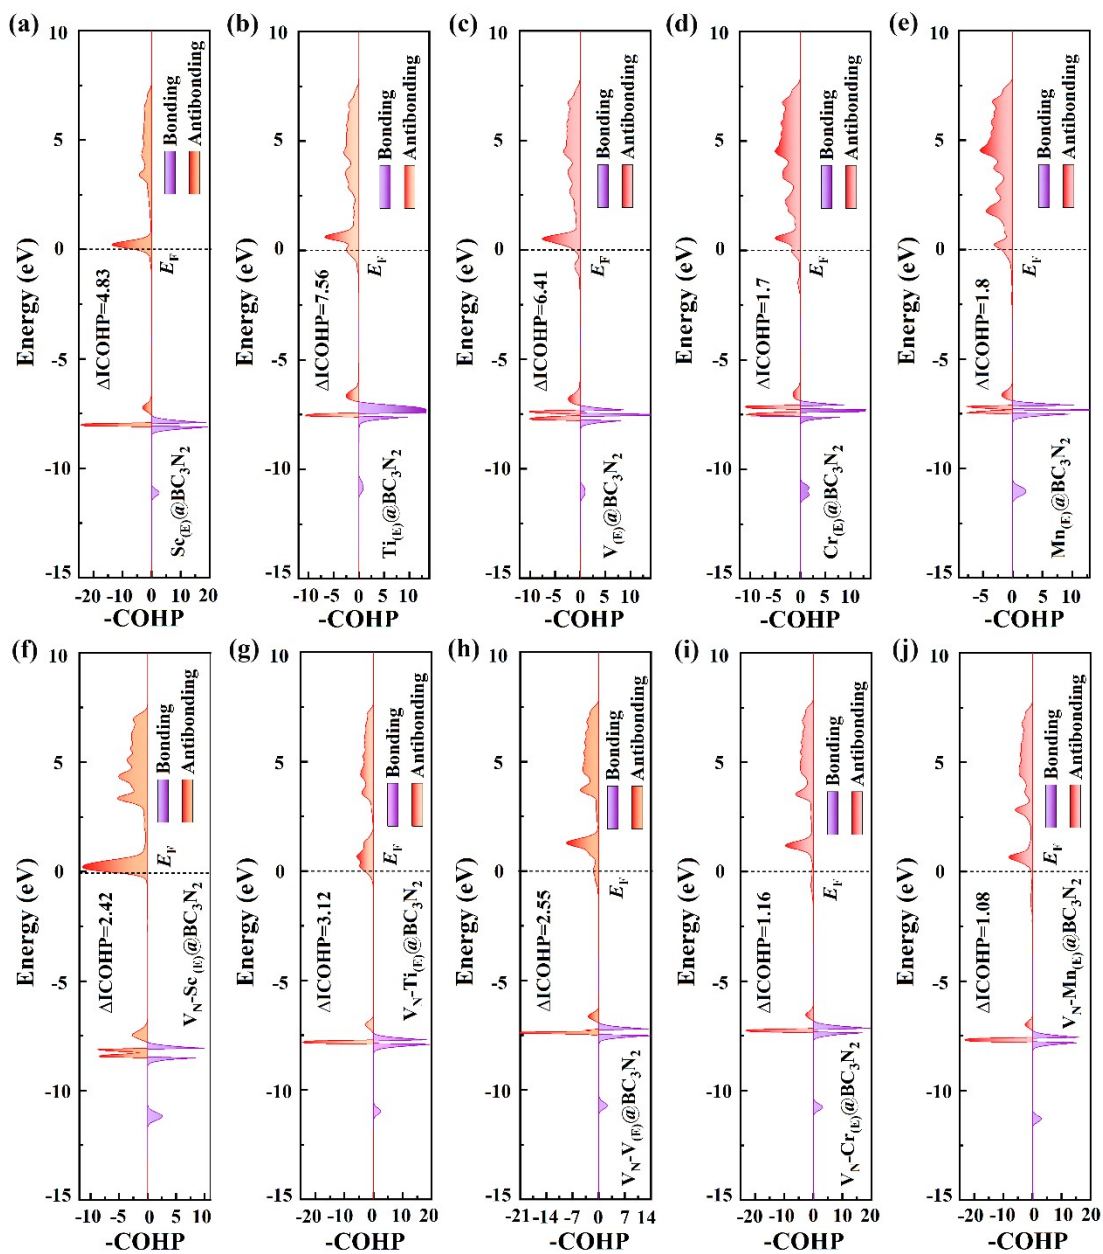

Fig. S4 Crystal Orbital Hamilton Population (COHP) between the two single atoms of nitrogen when  $N_2$  vertical adsorption on  $TM@BC_3N_2$  and  $V_N-TM@BC_3N_2$  ( $TM = Sc, Ti, V, Cr, Mn$ ).

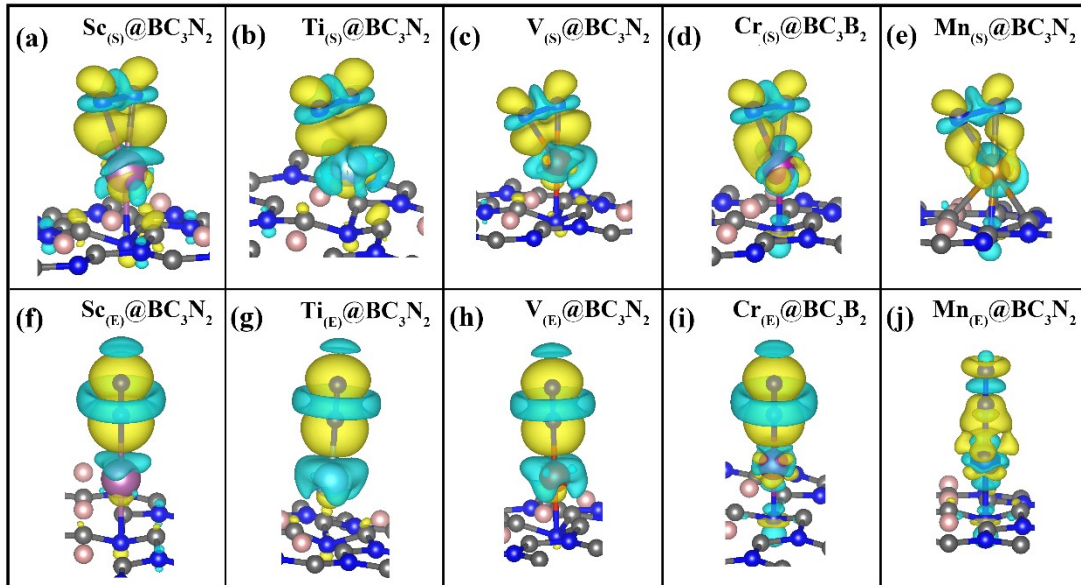

Fig. S5 The difference charge of N<sub>2</sub> horizontal and vertical adsorbed on TM@BC<sub>3</sub>N<sub>2</sub> (TM=Sc, Ti, V, Cr, Mn). The isosurface value is 0.003 e/Å. The blue region represents the electron accumulation, while yellow blue region corresponds the electron loss.

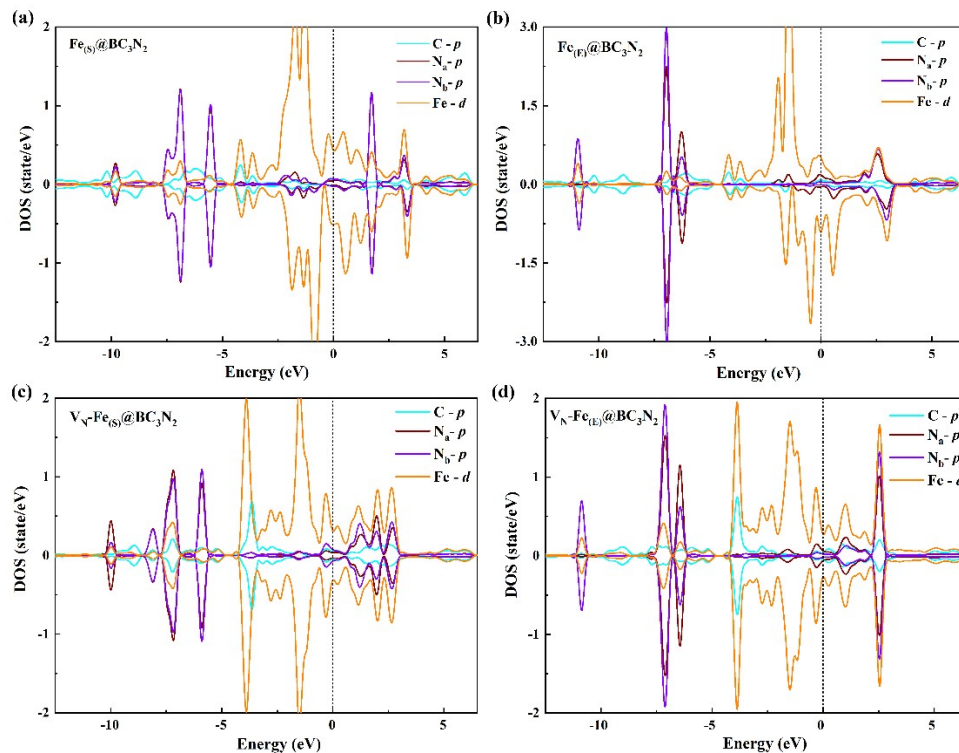

Fig. S6 (a)-(d) The density of states (DOS) plots of N<sub>2</sub> end-on and side-on adsorption on Fe/V<sub>N</sub>-Fe@BC<sub>3</sub>N<sub>2</sub> system.

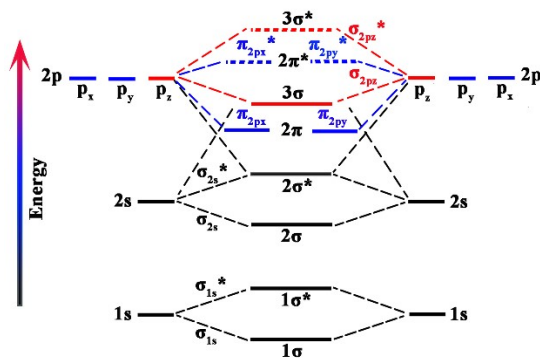

Fig. S7 Molecular orbital diagram of nitrogen.

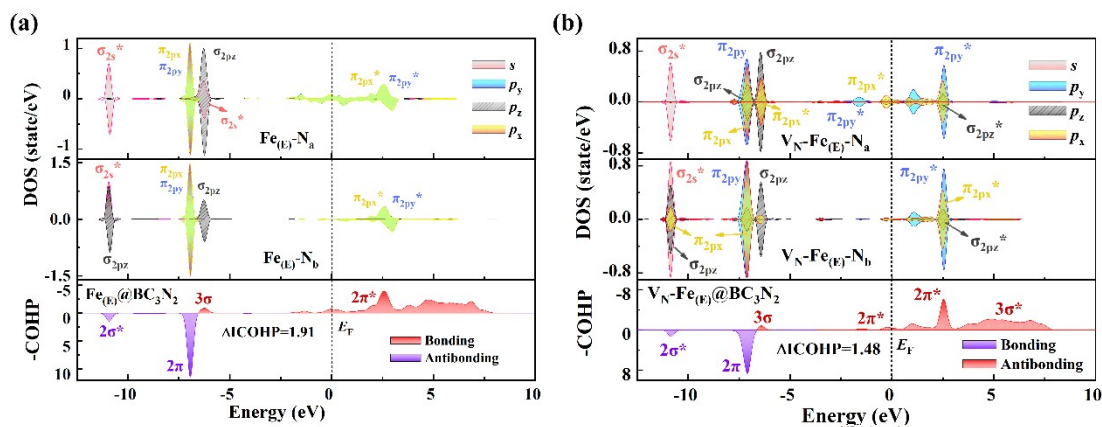

Fig. S8. (a) and (b) are the PDOS of two single atoms of nitrogen and the Crystal orbital Hamilton population (COHP) between N-N of adsorbed  $N_2$  when  $N_2$  end-on adsorption on Fe/ $V_N$ -Fe@ $BC_3N_2$ .

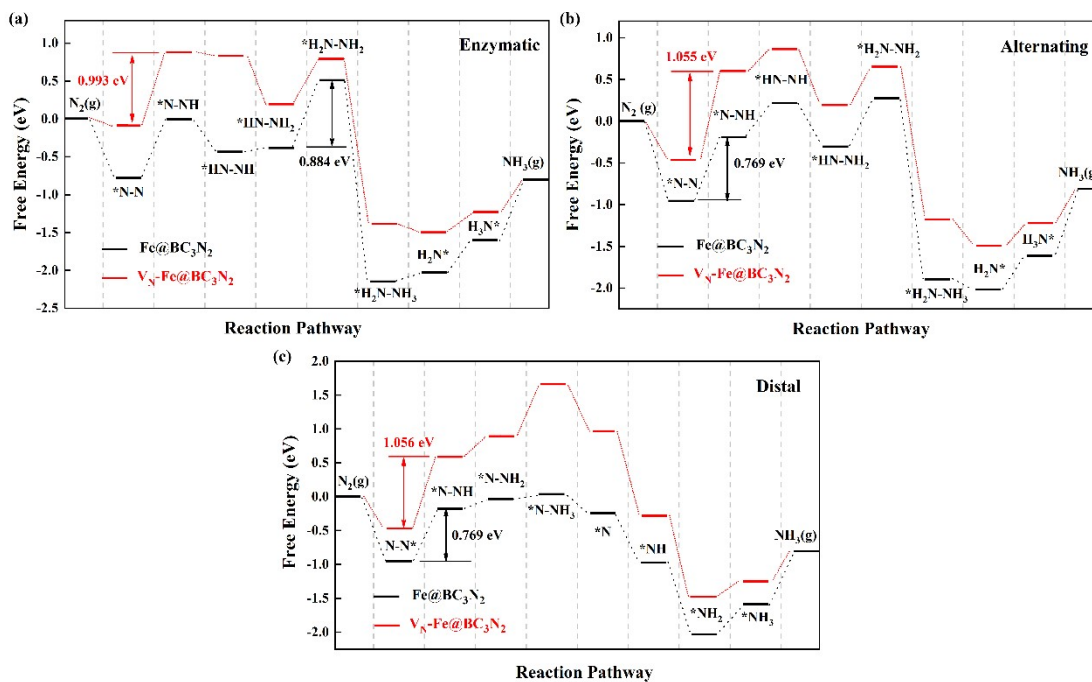

Fig. S9. Free energy diagrams for N<sub>2</sub> reduction on Fe/V<sub>N</sub>-Fe@BC<sub>3</sub>N<sub>2</sub> through (a) enzymatic, (b) alternating, and (c) distal mechanisms.

**Table S1** Summary of lattice constant  $a$ ,  $b$ , bond length  $d_1$ ,  $d_2$ , and bond angle  $\alpha$ ,  $\beta$ ,  $\gamma$  (see Fig. 1(a)) for BC<sub>3</sub>N<sub>2</sub>.

|                                | $a$ (Å) | $d_1$ (Å) | $d_2$ (Å) | $\alpha$ (°) | $\beta$ (°) | $\gamma$ (°) |
|--------------------------------|---------|-----------|-----------|--------------|-------------|--------------|
| BC <sub>3</sub> N <sub>2</sub> | 4.277   | 1.395     | 1.482     | 120.0        | 117.9       | 124.2        |

**Table S2** The calculated results for Sc to Zn adsorbed on BC<sub>3</sub>N<sub>2</sub> monolayer. The adsorption energy, Bader charge and bond length between TM and the closest B, C, N atoms.

| Configurations<br>Metal-site | $E_b$ (eV)   | Bader charge<br>( $e$ ) | Bond length (Å) |              |              |
|------------------------------|--------------|-------------------------|-----------------|--------------|--------------|
|                              |              |                         | Metal-B         | Metal-C      | Metal-N      |
| Sc-T <sub>B</sub>            | -2.10        | -0.961                  | 2.320           | 2.354        | 3.159        |
| Sc-H                         | -2.65        | -1.319                  | 2.567           | 2.140        | 2.330        |
| <b>Sc-T<sub>N</sub></b>      | <b>-3.29</b> | <b>-1.179</b>           | <b>3.062</b>    | <b>2.203</b> | <b>2.240</b> |
| Ti-T <sub>B</sub>            | -2.32        | -0.811                  | 2.233           | 2.294        | 3.11         |
| Ti-H                         | -2.80        | -0.866                  | 2.364           | 2.09         | 2.45         |
| <b>Ti-T<sub>N</sub></b>      | <b>-3.47</b> | <b>-1.056</b>           | <b>2.97</b>     | <b>2.104</b> | <b>2.149</b> |
| V-T <sub>B</sub>             | -1.96        | -0.65                   | 2.167           | 2.262        | 3.089        |
| V-H                          | -2.12        | -0.732                  | 2.303           | 2.099        | 2.516        |
| <b>V-T<sub>N</sub></b>       | <b>-2.65</b> | <b>-0.891</b>           | <b>2.975</b>    | <b>2.063</b> | <b>2.067</b> |
| Cr-T <sub>B</sub>            | -0.74        | -0.357                  | 2.235           | 2.539        | 3.259        |
| Cr-B <sub>B-C</sub>          | -0.90        | -0.393                  | 2.46            | 2.107        | 2.964        |
| Cr-H                         | -0.88        | -0.397                  | 2.283           | 2.106        | 2.787        |
| <b>Cr-T<sub>N</sub></b>      | <b>-1.36</b> | <b>-0.711</b>           | <b>2.969</b>    | <b>2.076</b> | <b>2.198</b> |
| Mn-T <sub>B</sub>            | -0.74        | -0.443                  | 2.224           | 2.449        | 3.206        |
| Mn-B <sub>B-C</sub>          | -0.75        | -0.43                   | 2.279           | 2.189        | 3.053        |
| <b>Mn-T<sub>N</sub></b>      | <b>-1.28</b> | <b>-0.619</b>           | <b>3.01</b>     | <b>2.146</b> | <b>2.202</b> |
| Fe-T <sub>B</sub>            | -1.36        | -0.296                  | 2.048           | 2.168        | 2.957        |
| Fe-T <sub>C</sub>            | -1.38        | -0.21                   | 2.316           | 1.955        | 2.822        |
| Fe-H                         | -1.68        | -0.4                    | 2.166           | 2.027        | 2.447        |
| <b>Fe-T<sub>N</sub></b>      | <b>-1.89</b> | <b>-0.48</b>            | <b>2.94</b>     | <b>2.073</b> | <b>2.124</b> |
| Co-T <sub>B</sub>            | -2.18        | -0.318                  | 1.92            | 2.066        | 2.93         |
| Co-B <sub>B-C</sub>          | -1.95        | -0.052                  | 2.152           | 1.893        | 2.806        |
| Co-H                         | -2.37        | -0.29                   | 2.07            | 1.952        | 2.415        |
| <b>Co-T<sub>N</sub></b>      | <b>-2.55</b> | <b>-0.35</b>            | <b>2.861</b>    | <b>1.94</b>  | <b>2.177</b> |
| Ni-T <sub>B</sub>            | -2.23        | -0.141                  | 1.935           | 2.236        | 2.035        |
| Ni-B <sub>B-C</sub>          | -2.62        | 0.025                   | 2.092           | 1.862        | 2.783        |
| <b>Ni-H</b>                  | <b>-2.65</b> | <b>-0.167</b>           | <b>2.253</b>    | <b>1.954</b> | <b>2.371</b> |



|                         |              |               |              |              |              |
|-------------------------|--------------|---------------|--------------|--------------|--------------|
| Ni-T <sub>N</sub>       | -2.52        | -0.285        | 2.0894       | 2.021        | 2.207        |
| Cu-T <sub>B</sub>       | -1.27        | 0.148         | 2.074        | 2.815        | 3.481        |
| <b>Cu-T<sub>C</sub></b> | <b>-1.37</b> | <b>-0.065</b> | <b>2.720</b> | <b>1.965</b> | <b>2.773</b> |
| Cu-T <sub>N</sub>       | -0.78        | -0.187        | 3.044        | 2.248        | 2.328        |
| Zn-T <sub>B</sub>       | -0.16        | -0.015        | 3.033        | 3.372        | 3.393        |
| Zn-B <sub>B-C</sub>     | -0.16        | -0.021        | 3.122        | 3.146        | 3.578        |
| Zn-B <sub>C-N</sub>     | -0.15        | -0.026        | 3.549        | 3.111        | 3.147        |
| Zn-T <sub>C</sub>       | -0.15        | -0.025        | 3.348        | 3.055        | 3.379        |
| <b>Zn-H</b>             | <b>-0.17</b> | <b>-0.027</b> | <b>3.261</b> | <b>3.273</b> | <b>3.030</b> |
| Zn-T <sub>N</sub>       | -0.14        | -0.025        | 3.905        | 3.356        | 3.095        |

**Table S3** The anchor atoms adsorption energy ( $E_b$ ), the charge transfer ( $\Delta Q_{TM}$ ) of TM atom anchored to the BC<sub>3</sub>N<sub>2</sub> nanosheet, the migration barrier of the TM on the substrate surface ( $E_{bar}$ ), the nitrogen vacancy formation energy ( $E_{VN}$ ) directly below the TM anchoring site.

| TM site           | $E_b$ (eV) | $\Delta Q_{TM}$ | $E_{bar}$ (eV) | $E_{VN}$ (eV) |
|-------------------|------------|-----------------|----------------|---------------|
| Sc-T <sub>N</sub> | -3.29      | -1.179          | 1.15           | 1.24          |
| Ti-T <sub>N</sub> | -3.47      | -1.056          | 0.75           | 0.26          |
| V-T <sub>N</sub>  | -2.65      | -0.891          | 0.61           | 0.06          |
| Cr-T <sub>N</sub> | -1.36      | -0.711          | 0.53           | 0.29          |
| Mn-T <sub>N</sub> | -1.28      | -0.619          | 0.47           | 0.12          |
| Fe-T <sub>N</sub> | -1.89      | -0.48           | 0.29           | -0.37         |
| Co-T <sub>N</sub> | -2.55      | -0.35           | 0.48           | -0.05         |
| Ni-H              | -2.65      | -0.167          | 0.09           | /             |
| Cu-T <sub>C</sub> | -1.37      | -0.065          | 0.31           | /             |
| Zn-H              | -0.18      | -0.027          | 0.01           | /             |

**Table S4** The N<sub>2</sub> adsorption energy ( $E_{ad(E)/(S)}$ ) of TM atom anchored to the BC<sub>3</sub>N<sub>2</sub> nanosheet.

| TM site           | N <sub>2</sub> site | $E_{ad(E)}$ | $E_{ad-VN(E)}$ | N <sub>2</sub> site | $E_{ad(S)}$ | $E_{ad-VN(S)}$ |
|-------------------|---------------------|-------------|----------------|---------------------|-------------|----------------|
| Sc-T <sub>N</sub> | <b>E</b>            | -0.75       | -0.54          | <b>S</b>            | -0.61       | -0.37          |

|                   |       |       |       |       |
|-------------------|-------|-------|-------|-------|
| Ti-T <sub>N</sub> | -1.20 | -0.87 | -1.14 | -0.69 |
| V-T <sub>N</sub>  | -1.35 | -1.16 | -1.23 | -0.90 |
| Cr-T <sub>N</sub> | -1.06 | -1.31 | -0.90 | -0.97 |
| Mn-T <sub>N</sub> | -0.96 | -1.11 | -0.78 | -0.80 |
| Fe-T <sub>N</sub> | -1.46 | -0.97 | -1.29 | -0.58 |
| Co-T <sub>N</sub> | -1.47 | -0.79 | -1.10 | -0.81 |
| Ni-H              | -1.38 | -     | -0.86 | -     |
| Cu-T <sub>C</sub> | -0.77 | -     | -0.77 | -     |
| Zn-H              | -0.03 | -     | -0.02 | -     |

**Table S5** The TM atoms' charge transfer ( $\Delta Q_{TM}$ ) of TM atom anchored to the BC<sub>3</sub>N<sub>2</sub> nanosheet, TM charge transfer ( $\Delta Q_{TM(S)}$ ,  $\Delta Q_{TM(E)}$ ) during nitrogen horizontal and vertical adsorption, TM charge transfer ( $\Delta Q_{VN-TM}$ ) in the presence of intrinsic nitrogen defects, the charge transfer of TM ( $\Delta Q_{VN-TM(S)}$ ,  $\Delta Q_{VN-TM(E)}$ ) after nitrogen horizontal adsorption and vertical adsorption in the presence of intrinsic nitrogen defects.

| TM site           | $\Delta Q_{TM}$ | $\Delta Q_{TM(S)}$ | $\Delta Q_{TM(E)}$ | $\Delta Q_{VN-TM}$ | $\Delta Q_{VN-TM(S)}$ | $\Delta Q_{VN-TM(E)}$ |
|-------------------|-----------------|--------------------|--------------------|--------------------|-----------------------|-----------------------|
| Sc-T <sub>N</sub> | -1.179          | -1.516             | -1.43              | -1.491             | -1.64                 | -1.634                |
| Ti-T <sub>N</sub> | -1.056          | -1.456             | -1.343             | -1.447             | -1.626                | -1.595                |
| V-T <sub>N</sub>  | -0.891          | -1.281             | -1.163             | -1.2831            | -1.477                | -1.432                |
| Cr-T <sub>N</sub> | -0.711          | -1.118             | -0.973             | -1.014             | -1.246                | -1.243                |
| Mn-T <sub>N</sub> | -0.619          | -0.985             | -0.86              | -0.822             | -1.025                | -0.999                |
| Fe-T <sub>N</sub> | -0.48           | -0.735             | -0.734             | -0.616             | -0.807                | -0.792                |
| Co-T <sub>N</sub> | -0.35           | -0.599             | -0.567             | -0.497             | -0.718                | -0.668                |
| Ni-H              | -0.167          | -0.478             | -0.432             | -                  | -                     | -                     |
| Cu-T <sub>C</sub> | -0.065          | -0.453             | -0.466             | -                  | -                     | -                     |
| Zn-H              | -0.027          | -0.045             | -0.043             | -                  | -                     | -                     |

**Table S6** The N<sub>2</sub> charge transfer ( $\Delta Q_{N_2(S)}$ ,  $\Delta Q_{N_2(E)}$ ) during nitrogen horizontal and vertical adsorption, the charge transfer of N<sub>2</sub> ( $\Delta Q_{VN-N_2(S)}$ ,  $\Delta Q_{VN-N_2(E)}$ ) after nitrogen horizontal adsorption and vertical adsorption in the presence of intrinsic nitrogen defects.

| TM-site           | $\Delta Q_{N_2(S)}$ | $\Delta Q_{N_2(E)}$ | $\Delta Q_{VN-N_2(S)}$ | $\Delta Q_{VN-N_2(E)}$ |
|-------------------|---------------------|---------------------|------------------------|------------------------|
| Sc-T <sub>N</sub> | 0.554               | 0.361               | 0.396                  | 0.297                  |
| Ti-T <sub>N</sub> | 0.609               | 0.439               | 0.487                  | 0.327                  |
| V-T <sub>N</sub>  | 0.637               | 0.397               | 0.522                  | 0.341                  |
| Cr-T <sub>N</sub> | 0.614               | 0.399               | 0.508                  | 0.375                  |
| Mn-T <sub>N</sub> | 0.575               | 0.390               | 0.463                  | 0.303                  |
| Fe-T <sub>N</sub> | 0.508               | 0.436               | 0.392                  | 0.346                  |
| Co-T <sub>N</sub> | 0.478               | 0.399               | 0.369                  | 0.289                  |
| Ni-H              | 0.396               | 0.318               | -                      | -                      |
| Cu-T <sub>C</sub> | 0.209               | 0.202               | -                      | -                      |
| Zn-H              | 0.018               | 0.015               | -                      | -                      |

**Table S7** The variation of N–N bond lengths in each configurations.

| configurations    | $\Delta d_{N-N}$ | configurations    | $\Delta d_{N-N}$ | configurations                    | $\Delta d_{N-N}$ | configurations                    | $\Delta d_{N-N}$ |
|-------------------|------------------|-------------------|------------------|-----------------------------------|------------------|-----------------------------------|------------------|
| Sc <sub>(S)</sub> | 4.95%            | Sc <sub>(E)</sub> | 2.33%            | V <sub>N</sub> -Sc <sub>(S)</sub> | 3.26%            | V <sub>N</sub> -Sc <sub>(E)</sub> | 1.78%            |
| Ti <sub>(S)</sub> | 5.93%            | Ti <sub>(E)</sub> | 2.97%            | V <sub>N</sub> -Ti <sub>(S)</sub> | 4.48%            | V <sub>N</sub> -Ti <sub>(E)</sub> | 2.04%            |
| V <sub>(S)</sub>  | 6.91%            | V <sub>(E)</sub>  | 2.67%            | V <sub>N</sub> -V <sub>(S)</sub>  | 5.13%            | V <sub>N</sub> -V <sub>(E)</sub>  | 2.21%            |
| Cr <sub>(S)</sub> | 7.14%            | Cr <sub>(E)</sub> | 2.84%            | V <sub>N</sub> -Cr <sub>(S)</sub> | 5.50%            | V <sub>N</sub> -Cr <sub>(E)</sub> | 2.26%            |
| Mn <sub>(S)</sub> | 6.91%            | Mn <sub>(E)</sub> | 2.86%            | V <sub>N</sub> -Mn <sub>(S)</sub> | 5.36%            | V <sub>N</sub> -Mn <sub>(E)</sub> | 2.15%            |
| Fe <sub>(S)</sub> | 6.79%            | Fe <sub>(E)</sub> | 2.78%            | V <sub>N</sub> -Fe <sub>(S)</sub> | 4.26%            | V <sub>N</sub> -Fe <sub>(E)</sub> | 2.40%            |
| Co <sub>(S)</sub> | 6.27%            | Co <sub>(E)</sub> | 2.60%            | V <sub>N</sub> -Co <sub>(S)</sub> | 3.30%            | V <sub>N</sub> -Co <sub>(E)</sub> | 2.06%            |
| Ni <sub>(S)</sub> | 4.87%            | Ni <sub>(E)</sub> | 2.14%            |                                   |                  |                                   |                  |
| Cu <sub>(S)</sub> | 1.52%            | Cu <sub>(E)</sub> | 1.58%            |                                   |                  |                                   |                  |
| Zn <sub>(S)</sub> | 0.06%            | Zn <sub>(E)</sub> | 0.06%            |                                   |                  |                                   |                  |

**Table S8** The computed ICOHPs for all N<sub>2</sub> adsorption configurations and the ICOHPs ( $\Delta_{ICOHP}$ ) difference between N<sub>2</sub> adsorption configurations and isolated N<sub>2</sub> molecule.

| Configurations                    | ICOHP  | $\Delta_{ICOHP}$ | Configurations                    | ICOHP  | $\Delta_{ICOHP}$ |
|-----------------------------------|--------|------------------|-----------------------------------|--------|------------------|
| Sc <sub>(E)</sub>                 | -18.08 | 4.83             | Sc <sub>(S)</sub>                 | -20.4  | 2.52             |
| Ti <sub>(E)</sub>                 | -15.35 | 7.56             | Ti <sub>(S)</sub>                 | -19.79 | 3.12             |
| V <sub>(E)</sub>                  | -16.51 | 6.41             | V <sub>(S)</sub>                  | -19.28 | 3.63             |
| Cr <sub>(E)</sub>                 | -21.22 | 1.7              | Cr <sub>(S)</sub>                 | -18.85 | 4.07             |
| Mn <sub>(E)</sub>                 | -21.11 | 1.8              | Mn <sub>(S)</sub>                 | -19.08 | 3.83             |
| Fe <sub>(E)</sub>                 | -21.01 | 1.91             | Fe <sub>(S)</sub>                 | -19.21 | 3.71             |
| Co <sub>(E)</sub>                 | -21.13 | 1.78             | Co <sub>(S)</sub>                 | -      | -                |
| Configurations                    | ICOHP  | $\Delta_{ICOHP}$ | Configurations                    | ICOHP  | $\Delta_{ICOHP}$ |
| V <sub>N</sub> -Sc <sub>(E)</sub> | -20.50 | 2.42             | V <sub>N</sub> -Sc <sub>(S)</sub> | -21.57 | 1.35             |

|               |        |      |               |        |      |
|---------------|--------|------|---------------|--------|------|
| $V_{N-Ti(E)}$ | -19.80 | 3.12 | $V_{N-Ti(S)}$ | -20.80 | 2.12 |
| $V_{N-V(E)}$  | -20.37 | 2.55 | $V_{N-V(S)}$  | -20.30 | 2.61 |
| $V_{N-Cr(E)}$ | -21.76 | 1.16 | $V_{N-Cr(S)}$ | -19.88 | 3.04 |
| $V_{N-Mn(E)}$ | -21.83 | 1.08 | $V_{N-Mn(S)}$ | -20.16 | 2.76 |
| $V_{N-Fe(E)}$ | -21.43 | 1.48 | $V_{N-Fe(S)}$ | -20.33 | 2.58 |
| $V_{N-Co(E)}$ | -21.72 | 1.20 | $V_{N-Co(S)}$ | -      | -    |

Table S9 Cohesion energy of metal quadruple cluster and binding energy of transition metal on  $BC_3N_2$  surface, where  $\Delta E_M$  and  $\Delta E_{VN-M}$  are the

| Metal-site | $E_{M@BC_3N_2}(eV)$ | $E_{VN-M@BC_3N_2}$ | Cohesive (eV)      |              |                   |
|------------|---------------------|--------------------|--------------------|--------------|-------------------|
|            |                     |                    | cluster of 4 atoms | $\Delta E_M$ | $\Delta E_{VN-M}$ |
| V- $T_N$   | -2.65               | -2.59              | -2.15              | -0.5         | -0.44             |
| Cr- $T_N$  | -1.363              | -1.071             | -1.06              | -0.303       | -0.011            |
| Mn- $T_N$  | -1.275              | -1.158             | -1.13              | -0.145       | -0.028            |
| Fe- $T_N$  | -1.892              | -2.265             | -2.17              | 0.278        | -0.095            |
| Co- $T_N$  | -2.549              | -2.596             | -2.25              | -0.299       | -0.346            |

## References

S1 L. Fu, R. Wang, C. Zhao, J. Huo, C. He, K-H. Kim, W. Zhang, Construction of Cr-embedded graphyne electrocatalyst for highly selective reduction of  $CO_2$  to  $CH_4$ : A DFT study, Chem. Eng. J. 414 (2021) 128857.
